# Supplementary material for: Surface Superconductivity Changes of Niobium Sheets by Femtosecond Laser-Induced Periodic Nanostructures
Source: MDPI journal article supplement (doi:10.3390/nano10122525), 2020-12-16
Supplement: s1 [file s1]

# Supplementary

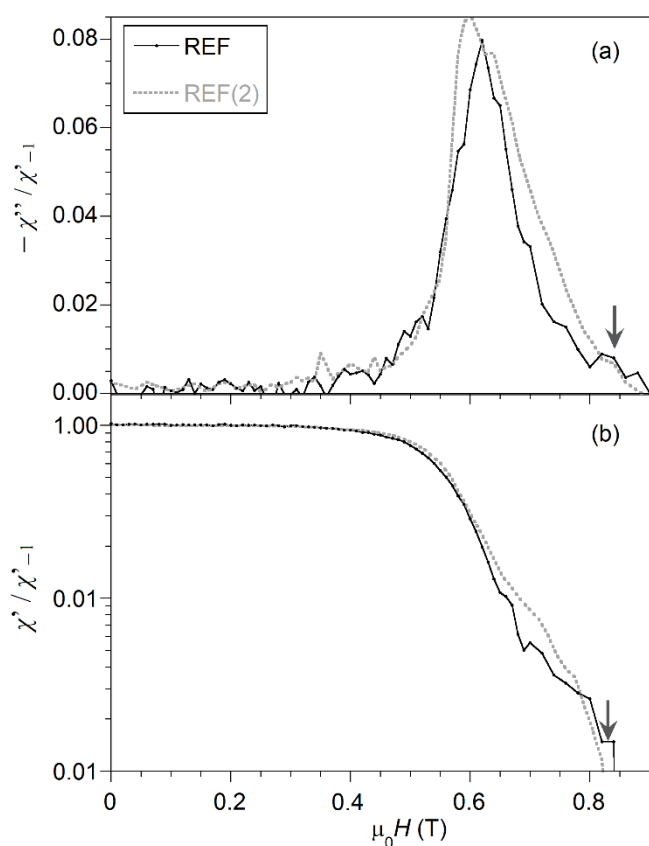

**Figure S1.** Comparison between  $\chi'(H)$  and  $\chi''(H)$  curves of two different non-irradiated samples, REF and REF(2), nominally identical. Magnetic fields were applied parallel to the  $y$ -axis and the measurements were performed at 5 K, 10 Hz and  $\mu_0 h_0 = 10 \mu\text{T}$  with descending fields from the initial field of 1.5 T. The arrows mark the  $\mu_0 H_{\text{CS}}$  values.

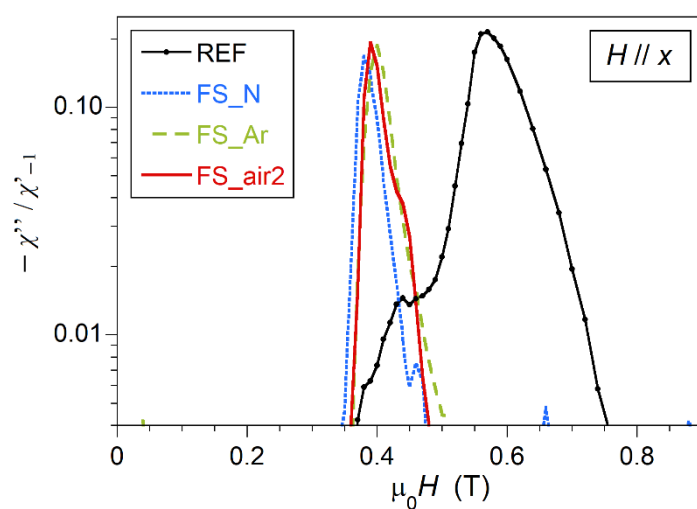

**Figure S2.**  $\chi''(H)$  for different samples at 5 K, 10 Hz and  $\mu_0 h_0 = 100 \mu\text{T}$ , measured in descending DC fields from the initial magnetic field 1.5 T. AC and DC magnetic fields were applied parallel to the  $x$ -axis.
